# Supplementary material for: Discovery of Nosiheptide, Griseoviridin, and Etamycin as Potent Anti-Mycobacterial Agents against Mycobacterium avium Complex
Source: MDPI journal article supplement (doi:10.3390/molecules24081495), 2019-04-16
Supplement: s1 [file s1]

## Supplementary Material

### General Experimental Procedures

ESI-MS spectrometry was conducted on a JMS-T100LP spectrometer (JEOL, Tokyo, Japan). UV and IR spectra were measured with a U-2800 spectrophotometer (Hitachi, Tokyo, Japan) and FT/IR-460 plus spectrometer (JASCO, Tokyo, Japan), respectively. The  $^{13}\text{C}$ -NMR and  $^1\text{H}$ -NMR spectra of **1–3** were taken on the XL-400 NMR system (Agilent, Santa Clara, CA, USA). Samples were measured in  $\text{CHCl}_3-d$  :  $\text{MeOH}-d_4 = 9 : 1$  for **1**, dimethyl sulfoxide- $d_6$  (DMSO- $d_6$ ) for **2**, and  $\text{CHCl}_3-d$  for **3**. The solvent peak was used as an internal standard at 7.26 ppm for  $\text{CHCl}_3-d$  :  $\text{MeOH}-d_4 = 9 : 1$ , 2.48 ppm for DMSO- $d_6$ , and 7.26 ppm for  $\text{CHCl}_3-d$  for the  $^1\text{H}$  NMR spectral data, and 77.0 ppm for  $\text{CHCl}_3-d$  :  $\text{MeOH}-d_4 = 9 : 1$ , 39.5 ppm for DMSO- $d_6$ , and 77.0 ppm for the  $^{13}\text{C}$  NMR spectral data.

### S-1. Structural elucidation of **1–3**

#### S-1.1. Compound **1**

Compound **1** was identified as nosiheptide by comparison with an authentic sample [1]. As shown in Figure S1, the  $^1\text{H}$ -NMR spectra of **1** had good agreement with an authentic sample. Furthermore, UFLC analysis was performed using a Prominence UFLC system (SHIMADZU) with a connected Shin pack XR-ODS column (SHIMADZU) under the following conditions: mobile phase, 7-min gradient from 30%  $\text{CH}_3\text{CN}$  to 70%  $\text{CH}_3\text{CN}$  containing 0.1%  $\text{H}_3\text{PO}_4$ ; flow rate, 0.55 mL/min; detection, UV at 210 nm; column temperature, 50 °C; injection volume, 0.2  $\mu\text{g}$  (0.1 mg/mL, 2  $\mu\text{L}$ , in 1% DMSO). The authentic sample and natural product **1** were eluted as a peak with a similar retention time (Figs. S2a and S2b), and each peak overlapped when a mixture of equal parts was analyzed (Fig. S2c).

Compound **1**:  $^1\text{H}$ -NMR (400 MHz,  $\text{CHCl}_3-d$  :  $\text{MeOH}-d_4 = 9 : 1$ )  $\delta = 1.15$  (d, 3H,  $J = 5.5$  Hz), 1.67 (d, 3H,  $J = 7.0$  Hz), 2.02 (br, 1H), 2.36 (t, 1H,  $J = 12.9$  Hz), 2.44 (s, 3H), 3.24 (obscured, 1H), 3.65 (m, 1H), 4.01 (m, 1H), 4.12 (d, 1H,  $J = 11.7$  Hz), 4.42 (s, 1H), 5.02 (d, 1H,  $J = 10.5$  Hz), 5.57 (d, 1H,  $J = 1.6$  Hz), 5.75 (t, 1H,  $J = 9.8$  Hz), 5.83 (d, 1H,  $J = 11.3$  Hz), 5.96 (br, 1H), 6.31 (q, 1H,  $J = 7.0$  Hz), 6.58 (d, 1H,  $J = 1.6$  Hz), 7.11 (d, 1H,  $J = 7.0$  Hz), 7.39 (t, 1H,  $J = 7.4$  Hz), 7.48 (d, 1H,  $J = 10.5$  Hz), 7.62 (s, 1H), 7.65 (s, 1H), 7.79 (br, 1H), 7.90 (s, 1H), 7.94 (br, 1H), 8.16 (s, 1H), 8.27 (s, 1H), 8.45 (s, 1H); HR ESI-MS ( $m/z$ ) [ $\text{M} + \text{H}$ ] $^+$  found: 1222.1540, calculated: 1222.1556 for  $\text{C}_{51}\text{H}_{44}\text{N}_{13}\text{O}_{12}\text{S}_6$ .

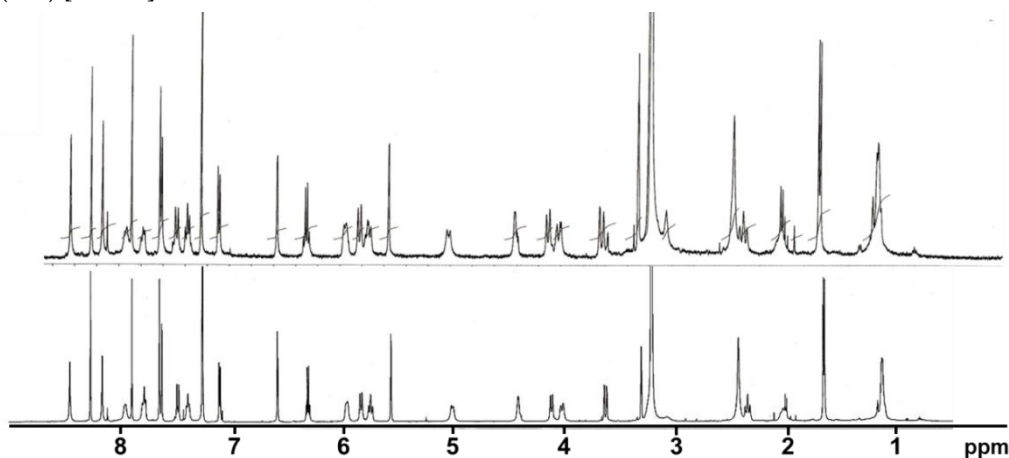

**Figure S1.**  $^1\text{H}$ -NMR spectrum of **1** in  $\text{CHCl}_3-d$  :  $\text{MeOH}-d_4 = 9 : 1$  (400 MHz)

Upper data represents  $^1\text{H-NMR}$  spectrum of the natural product. Lower data represents that of the authentic sample of nosiheptide.

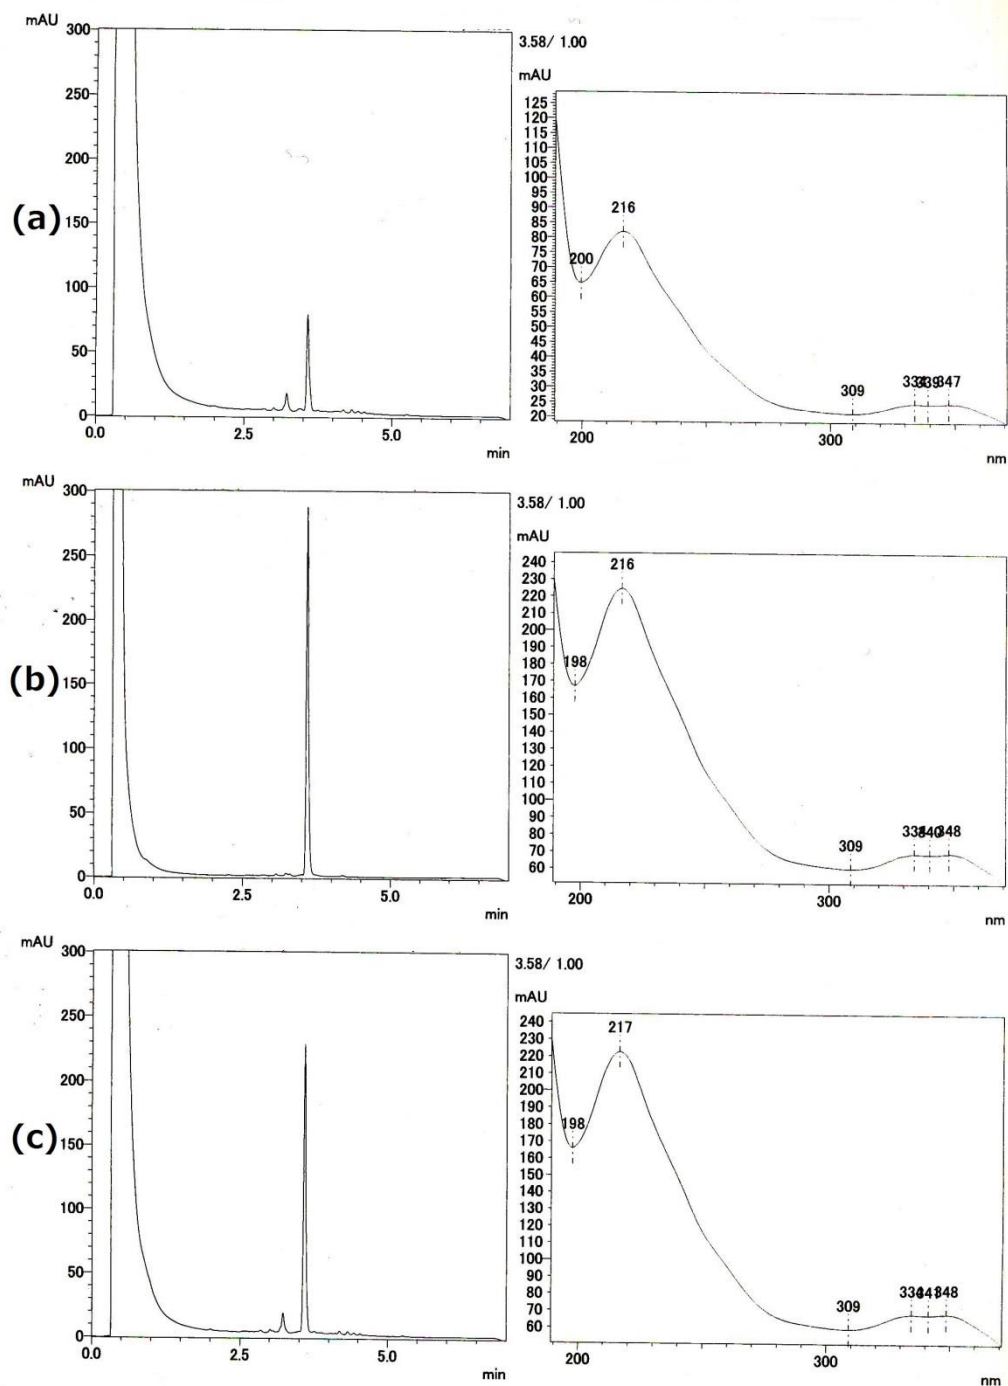

**Figure S2.** Comparison of the natural product and authentic sample of nosiheptide

(a): Natural product. (b): Authentic sample. (c): Mixture of the natural product 1 and authentic sample.

### S-1.2. Compounds 2 and 3

Compounds 2 and 3 were identified as griseoviridin and etamycin (viridogrisein) by comparison with the reported chemical shift values by <sup>1</sup>H-NMR and <sup>13</sup>C-NMR spectra, respectively [2].

Compound 2: <sup>1</sup>H-NMR (400 MHz, DMSO-*d*<sub>6</sub>) and <sup>13</sup>C-NMR (100 MHz, DMSO-*d*<sub>6</sub>) see Table S1; HR ESI-MS (*m/z*) [M + Na]<sup>+</sup> found: 500.1470, calculated: 500.1467 for C<sub>22</sub>H<sub>27</sub>N<sub>3</sub>NaO<sub>7</sub>S.

Compound 3: <sup>1</sup>H-NMR (400 MHz, CHCl<sub>3</sub>-*d*) δ = 0.60 (d, 3H, J = 7.0 Hz), 0.77 (d, 3H, J = 7.0 Hz), 0.94 (overlapped, 3H), 0.96 (overlapped, 3H), 0.98 (overlapped, 3H), 1.17 (d, 3H, J = 6.6 Hz), 1.39 (d, 3H, J = 6.2 Hz), 1.48 (m, 1H), 1.80 (m, 1H), 1.84 (m, 1H), 1.91 (m, 1H), 2.06 (d, 1H, J = 14.5 Hz), 2.15 (m, 1H), 2.21 (m, 1H), 2.79 (s, 3H), 2.82 (s, 3H), 2.92 (s, 3H), 3.73 (dd, 1H, J = 11.0 Hz, 5.9 Hz), 3.87 (d, 1H, J = 16.8 Hz), 4.42 (dd, 1H, J = 11.0 Hz, 6.2 Hz), 4.54 (m, 1H), 4.88 (m, 1H), 4.89 (m, 1H), 5.06 (overlapped, 1H), 5.08 (overlapped, 1H), 5.17 (overlapped, 1H), 5.18 (overlapped, 1H), 5.35 (d, 1H, J = 16.8 Hz), 5.66 (s, 1H), 6.69 (d, 1H, J = 11.7 Hz), 7.25 (overlapped, 1H), 7.26 (overlapped, 1H), 7.32 (overlapped, 1H), 7.41 (overlapped, 3H), 8.07 (d, 1H, J = 3.5 Hz), 8.33 (d, 1H, J = 8.6 Hz), 8.95 (d, 1H, 7.4 Hz), 11.78 (s, 1H); <sup>13</sup>C-NMR (100 MHz, CHCl<sub>3</sub>-*d*) δ = 8.6, 13.6, 15.5, 18.2, 21.2, 21.7, 23.2, 24.4, 28.6, 30.2, 32.0, 35.7, 35.9, 37.7, 39.6, 46.1, 49.1, 52.6, 53.3, 54.2, 58.4, 58.7, 63.0, 70.3, 70.8, 125.9, 128.7, 129.2, 129.2, 129.8, 130.7, 130.9, 139.9, 157.6, 166.1, 167.5, 167.9, 169.2, 169.8, 172.4, 173.5, 174.1 (Only the major rotamer is shown); HR ESI-MS (*m/z*) [M + Na]<sup>+</sup> found: 901.4468, calculated: 901.4435 for C<sub>44</sub>H<sub>62</sub>N<sub>8</sub>NaO<sub>11</sub>.

**Table S1.** The  $^1\text{H}$ -NMR and  $^{13}\text{C}$ -NMR data of **2** and reported values of griseoviridin in  $\text{DMSO-}d_6$ .

| position | <b>2</b>                       |                                                       | Reported values [2]            |                                                       |
|----------|--------------------------------|-------------------------------------------------------|--------------------------------|-------------------------------------------------------|
|          | $\delta_{\text{C}}^{\text{a}}$ | $\delta_{\text{H}}^{\text{b}}$ mult ( <i>J</i> in Hz) | $\delta_{\text{C}}^{\text{c}}$ | $\delta_{\text{H}}^{\text{d}}$ mult ( <i>J</i> in Hz) |
| 1        |                                |                                                       |                                |                                                       |
| 2        | 130.4, q                       |                                                       | 130.4, q                       |                                                       |
| 3        | 144.6, t                       | 7.32, dd (9.0, 7.4)                                   | 144.4, t                       | 7.35, dd (9.0, 7.5)                                   |
| 4        | 37.4, d                        | 2.97, 2.39, m                                         | 37.3, d                        | 2.89, m, 2.40, dd (7.5)                               |
| 5        | 70.8, t                        | 5.10, m                                               | 70.7, t                        | 5.12, dq                                              |
| 6        |                                |                                                       |                                |                                                       |
| 7        | 170.7, q                       |                                                       | 170.6, q                       |                                                       |
| 8        | 50.2, t                        | 4.52, m                                               | 50.1, t                        | 4.53, ddd (7.5, 10.5, 5.0)                            |
| 9        | 38.4, d                        | 3.44, 2.66, m                                         | 38.3, d                        | 3.47, m, 2.67, dd (11, 14.5)                          |
| 10       | NH                             | 7.20, d (8.6)                                         | NH                             |                                                       |
| 11       | 158.8, q                       |                                                       | 158.7, q                       |                                                       |
| 12       | 134.4, q                       |                                                       | 134.3, q                       |                                                       |
| 13       |                                |                                                       |                                |                                                       |
| 14       | 162.7, q                       |                                                       | 162.1, q                       |                                                       |
| 15       |                                |                                                       |                                |                                                       |
| 16       | 141.3, t                       | 8.55, s                                               | 144.1, t                       | 8.56, s                                               |
| 17       | 35.5, d                        | 2.86, 2.81, m                                         | 35.4, d                        | 2.90, dd (9.5, 16.5), 2.81, dd (9.0, 16.5)            |
| 18       | 65.2, t                        | 3.91, m                                               | 65.2, t                        | 3.92, m                                               |
| 19       | 44.3, d                        | 1.56, 1.45, m                                         | 44.2, d                        | 1.57, m, 1.46, t (11)                                 |
| 20       | 69.1, t                        | 4.1, m                                                | 68.9, t                        | 4.11, m                                               |
| 21       | 136.5, t                       | 5.52, dd (14.9, 8.2)                                  | 136.4, t                       | 5.53, dd (15.5, 8.5)                                  |
| 22       | 130.1, t                       | 6.18, dd (15.3, 10.6)                                 | 130.0, t                       | 6.19, dd (15, 10.5)                                   |
| 23       | 128.4, t                       | 5.95, dd (15.3, 10.6)                                 | 128.4, t                       | 5.96, dd (15, 10.5)                                   |
| 24       | 129.3, t                       | 5.71, dt (15.3, 3.9)                                  | 129.2, t                       | 5.74, dt (15.5, 4.0)                                  |
| 25       | 40.2, d                        | 3.91, 3.71, m                                         | 40.0, d                        | 3.96, m, 3.77, m                                      |
| 26       | NH                             | 8.30, t (5.87)                                        | NH                             |                                                       |
| 27       | 162.1, q                       |                                                       | 162.6, q                       |                                                       |
| 28       | 20.3, s                        | 1.37, d (6.3)                                         | 20.1, s                        | 1.38, d (6.5)                                         |

a: 100 MHz. b: 400 MHz. c: 125 MHz. d: 500 MHz.

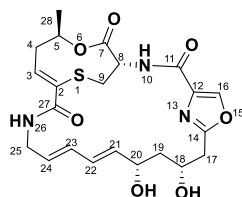

20160115-MA1730-A-COSY

exp11 PROTON

```
SAMPLE      PRESATURATION
date Jan 15 2016 satmode n
solvent dmsc wet n
file /home/vnmr1/v-
nmrsvs/data_server- temp not used
/biseibutyakuhin/~ gain 30
hosoda/20160115-MA- spin 16
1730-A-COSY_201601- hat 0.008
15_01/PROTON_01 pw90 13.100
ACQUISITION alfa 10.000

sw 6410.3 FLAGS
at 2.556 i1 n
np 32768 in n
fb 4000 dp y
bs 32 hs nn
dl 3.000 PROCESSING
nt 32 lb 0.20
ct 32 fn not used

TRANSMITTER H1 sp DISPLAY
tn 458.3
sfrq 400.282 wp 3006.4
tof 400.3 rfl 1797.4
tpwr 61 rfp 992.7
pw 6.550 rp 177.6

DECOUPLER lp 0

dn C13 PLOT
dof 0 wc 267
dm nn pc 8
decwave W40_HCHEMA vs 609
dpr 37 th 34
dmf 29412 ai cdc ph
```

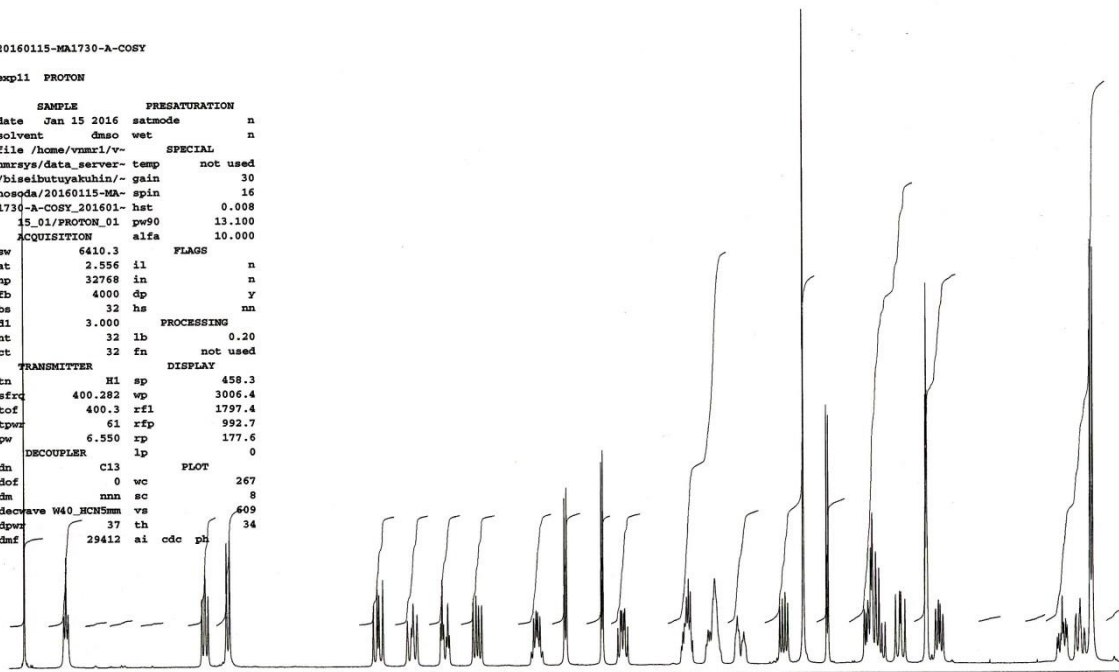

Figure S3.  $^1\text{H}$ -NMR spectrum of **2** in  $\text{DMSO-}d_6$  (400 MHz)

MA1730-A-CARBON

exp1 CARBON

```
SAMPLE      PRESATURATION
date Jan 18 2016 satmode n
solvent dmsc wet n
file /home/vnmr1/v-
nmrsvs/data_copy/M- temp not used
A1730-A-CARBON_201- gain 30
60118_01/CARBON_01 spin 20
ACQUISITION hat 0.008
sw 24038.5 pw90 11.312
at 1.363 alfa 10.000

np 65536 FLAGS
fb 17000 i1 n
bs 16 in n
dl 2.000 dp y
nt 30000 hs nn
ct 12432 PROCESSING
tn 0.50
TRANSMITTER C13 fn not used
sfrq 100.661 DISPLAY
tof 1029.4 sp -10.7
tpwr 57 wp 18115.4
pw 5.656 rfl 5474.8
DECOUPLER rfp 3975.7
dn H1 rp 127.8
dof 0 lp 0
dm yy PLOT
decwave W wc 267
dpr 48 sc 8
dmf 9757 va 27773.6
th 48
ai cdc ph
```

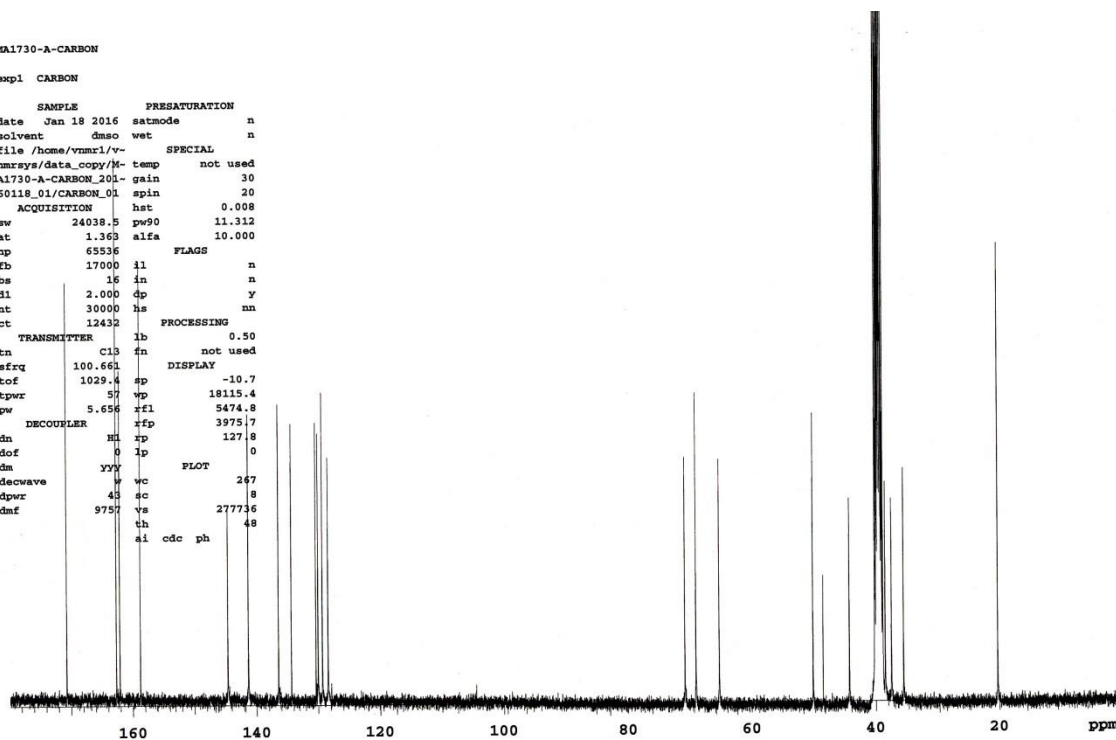

Figure S4.  $^{13}\text{C}$ -NMR spectrum of **2** in  $\text{DMSO-}d_6$  (100 MHz)

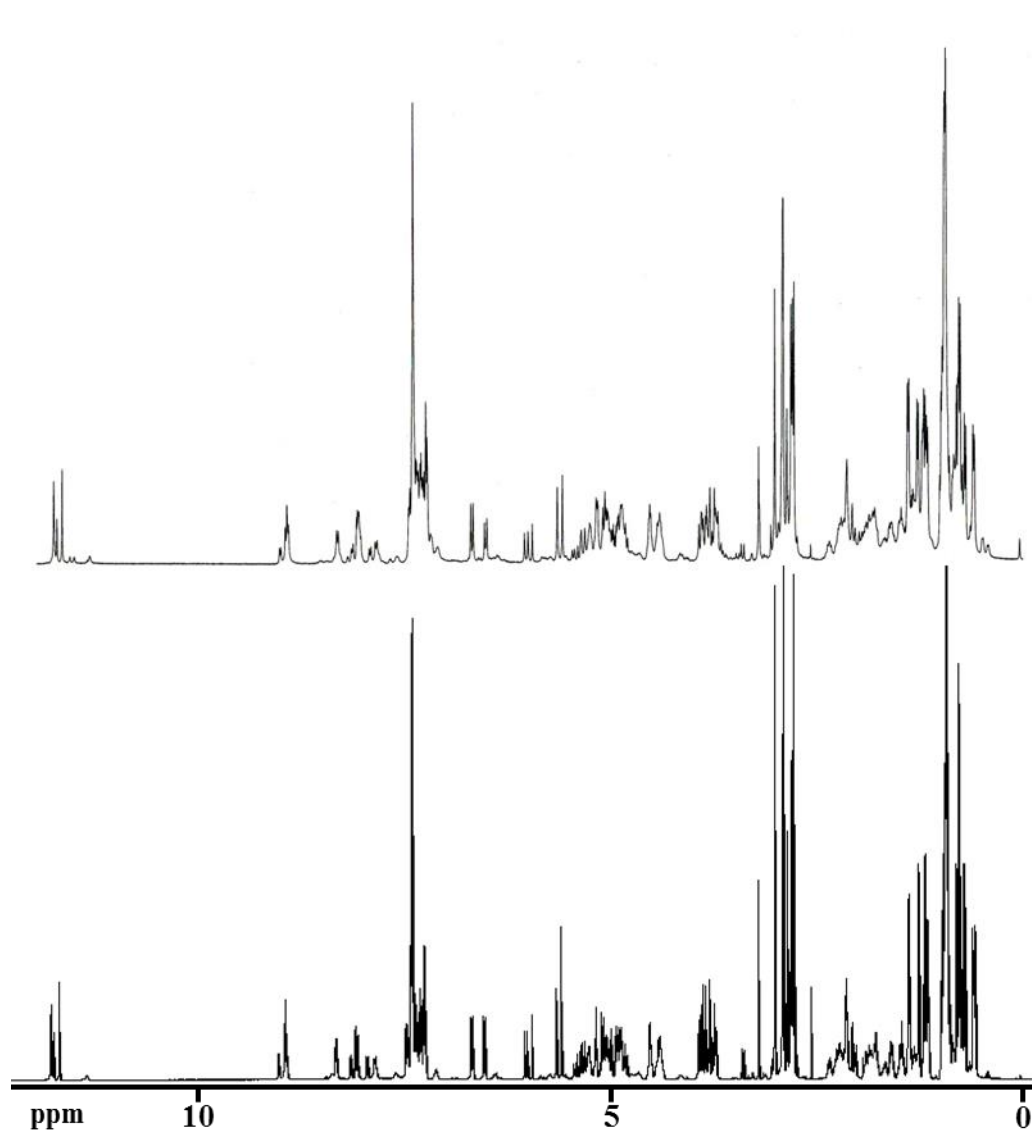

**Figure S5.**  $^1\text{H-NMR}$  spectrum of **3** in  $\text{CHCl}_3-d$

Upper data represents the  $^1\text{H-NMR}$  (400 MHz) spectrum of **3**. Lower data represents the reported  $^1\text{H-NMR}$  (500 MHz) spectrum data of etamycin [3].

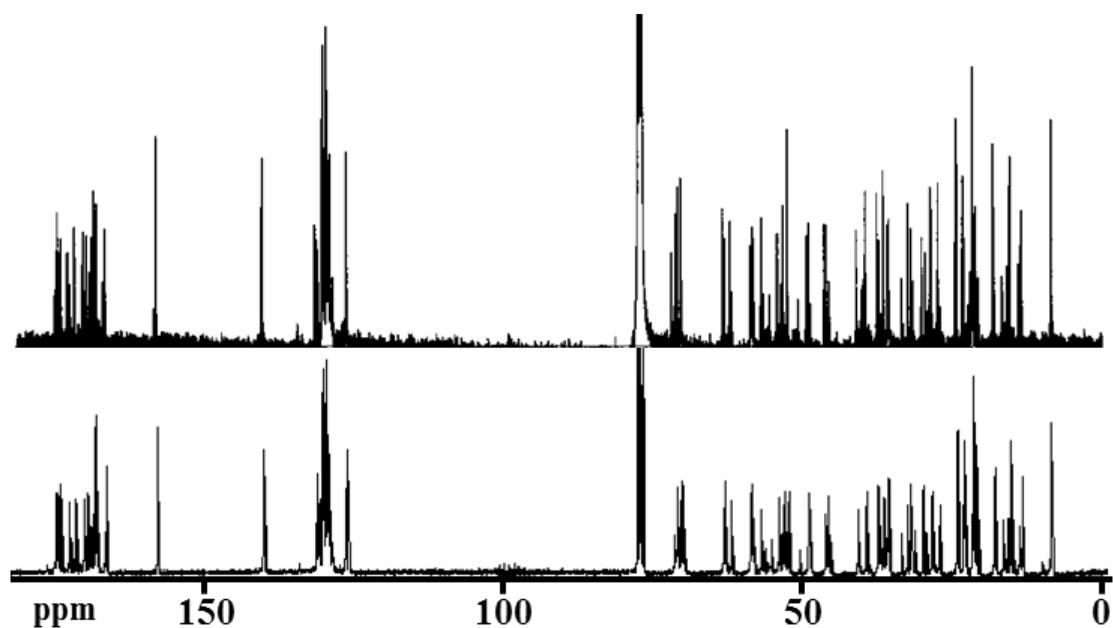

**Figure S6.**  $^{13}\text{C}$ -NMR spectrum of **3** in  $\text{CHCl}_3-d$

Upper data represents the  $^{13}\text{C}$ -NMR (100 MHz) spectrum of **3**. Lower data represents the reported  $^{13}\text{C}$ -NMR (125 MHz) spectrum data of etamycin [3].

#### Acknowledgments

We express our thanks to Prof. Hans-Dieter Arndt, School of Pharmacy, Friedrich-Schiller-Universität Jena, for providing authentic sample of nosiheptide.

#### References

1. Wojts, K.P.; Riedrich, M.; Lu, J.Y.; Winter, P.; Winkler, T.; Walter, S.; Arndt, H.D. Total synthesis of nosiheptide. *Angew. Chem. Int. Ed. Engl.* **2016**, *55*, 9772-9776, 10.1002/anie.201603140.
2. Xie, Y.; Li, Q.; Song, Y.; Ma, J.; Ju, J. Involvement of SgvP in carbon-sulfur bond formation during Griseoviridin biosynthesis. *Chembiochem.* **2014**, *15*, 1183-1189, 10.1002/cbic.201400062.
3. Haste, N.M.; Perera, V.R.; Maloney, K.N.; Tran, D.N.; Jensen, P.; Fenical, W.; Nizet, V.; Hensler, M.E. Activity of the streptogramin antibiotic etamycin against methicillin-resistant *Staphylococcus aureus*. *J. Antibiot.* **2010**, *64*, 219-224, 10.1038/ja.2010.22.
